# Supplementary material
Source: MDPI journal article supplement (https://www.mdpi.com/2077-0472/13/11/2147)
Supplement: s1 [file s1]

**Supplementary materials**

**A New Protocol to Mitigate Damage to Germination Caused by Black  
Layers in Maize (*Zea mays* L.) Seeds**

**Joon Ki Hong, Jeongho Baek, Sang Ryeol Park, Gang Seob Lee and Eun Jung Suh \***

Gene Engineering Division, National Institute of Agricultural Sciences, Rural Development  
Administration, 370 Nongsaengmyeong-ro, Jeonju 54874, Republic of Korea

\* Correspondence: seji00@korea.kr; Tel.: +82-63-238-4660

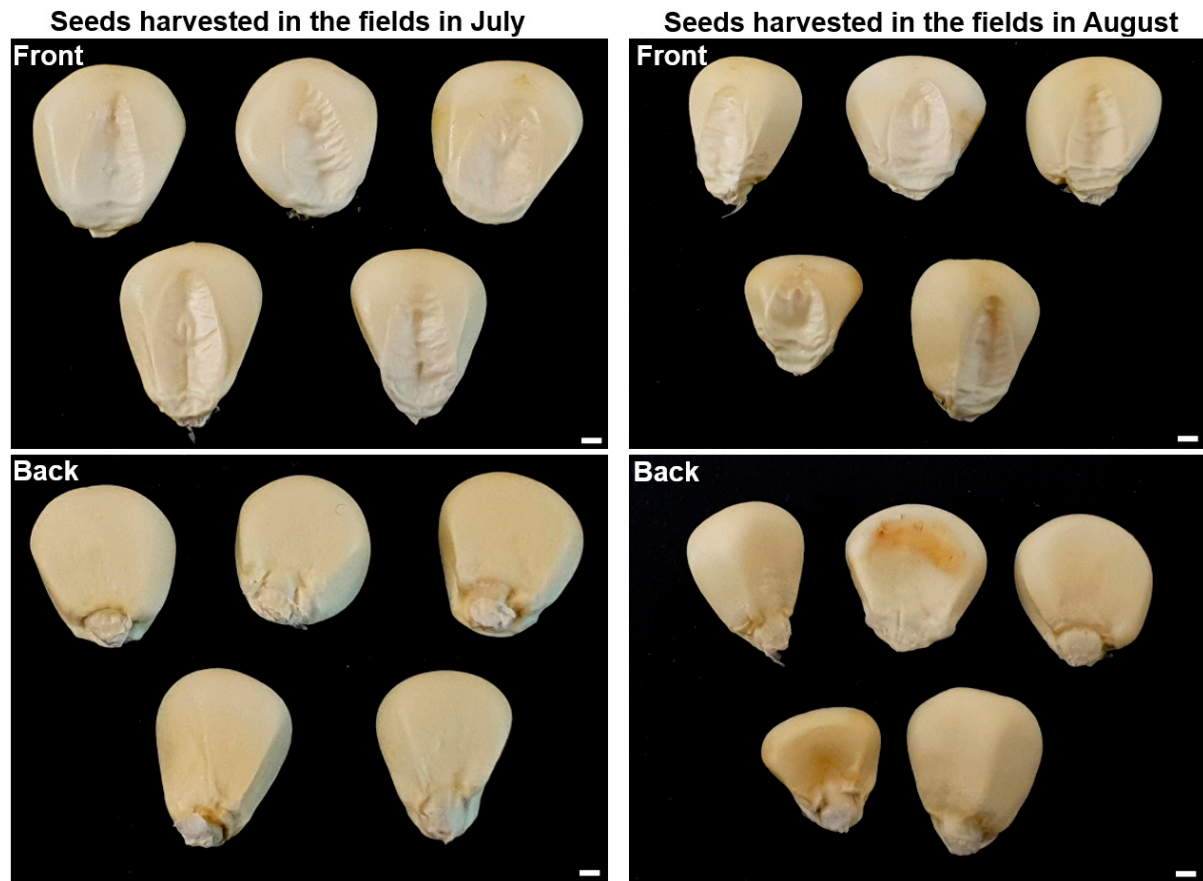

**Figure S1.** Phenotypes of maize Hi IIA seeds harvested from fields in July and August. Seeds harvested in August were more contaminated by microorganisms than seeds harvested in July. Seeds that were severely contaminated were removed, and the remaining seeds were mixed and used for research. Bars = 1 mm.

### Maize seed sterilization methods

- 20 grains (35ml sterilized dH<sub>2</sub>O – control )
- 20 grains (35ml 100% commercial bleach + 35 µl Tween20)

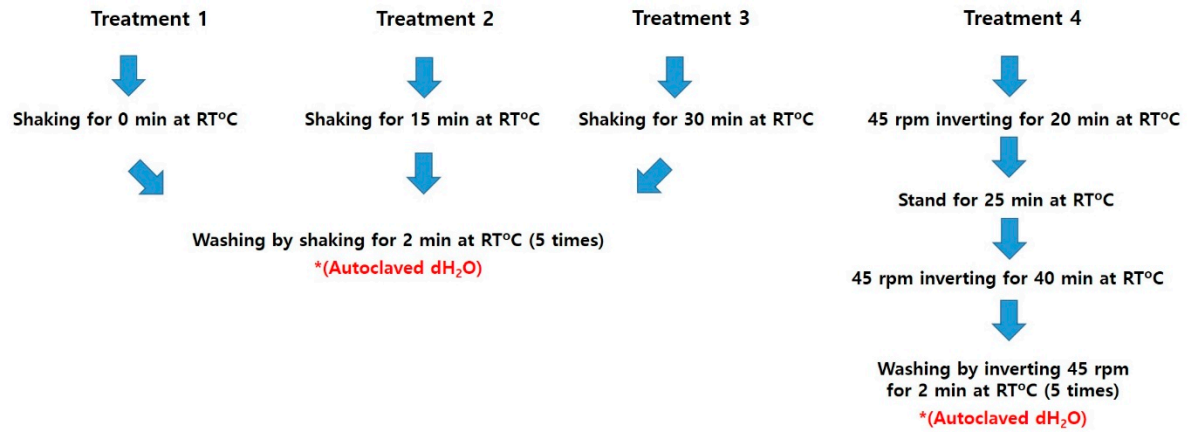

**Figure S2.** The applied methods of maize seed sterilization.

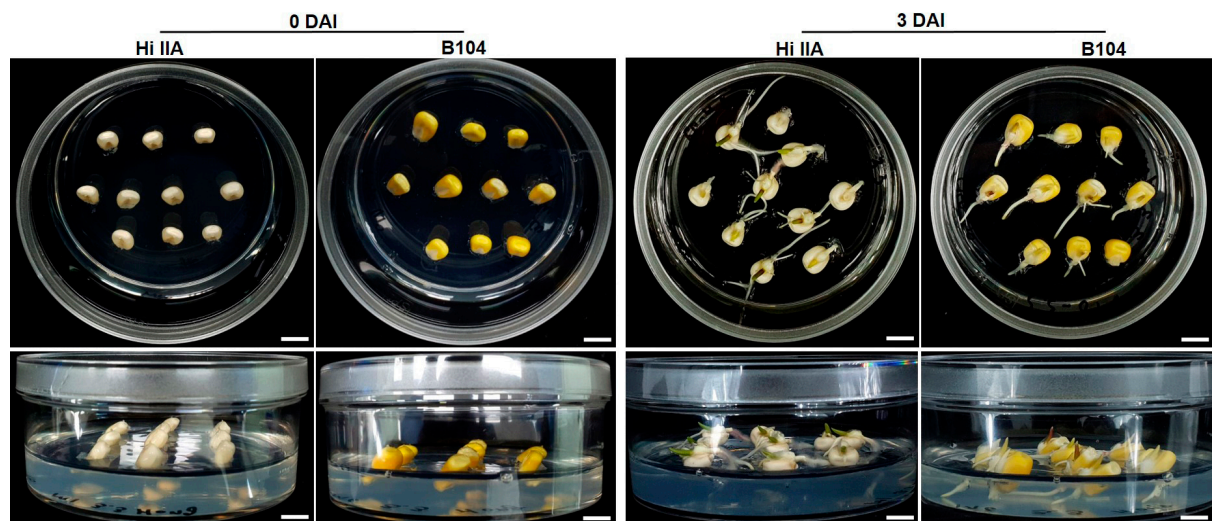

**Figure S3.** Placement and growth of sterilized maize seeds on the MS medium. The maize seeds was placed to 40~45 angles by touching the medium, the germination was confirmed 3 days after imbibition. DAI, days after imbibition. Bars = 1 cm.

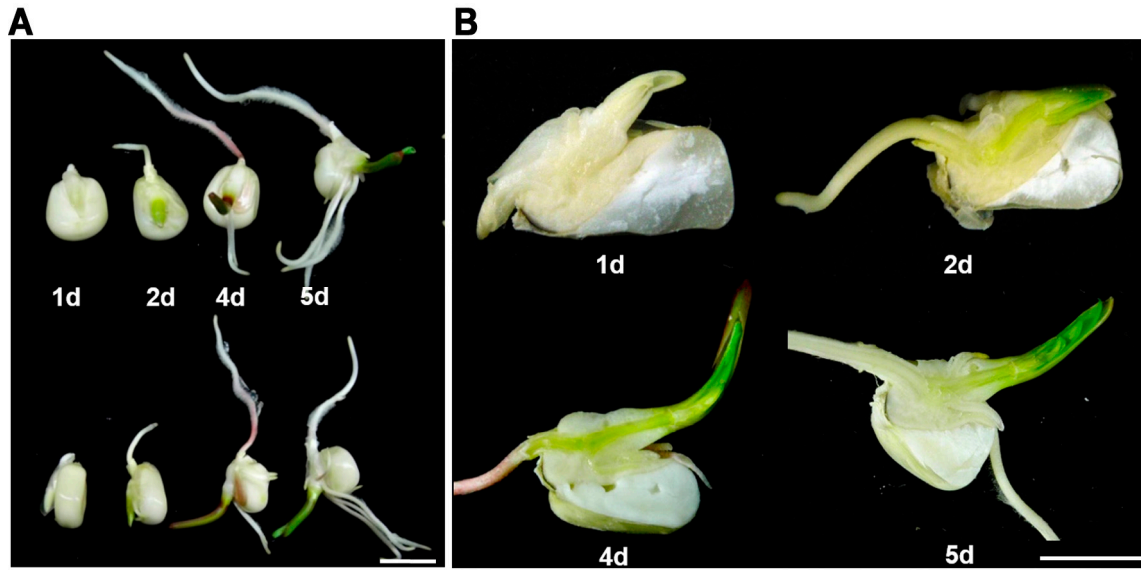

**Figure S4.** Germination of maize Hi IIA seeds after exposure to sterilization treatment. (A) Seed germination and seedling development. (B) Longitudinal cut of seed during germination. Bars = 1 cm.

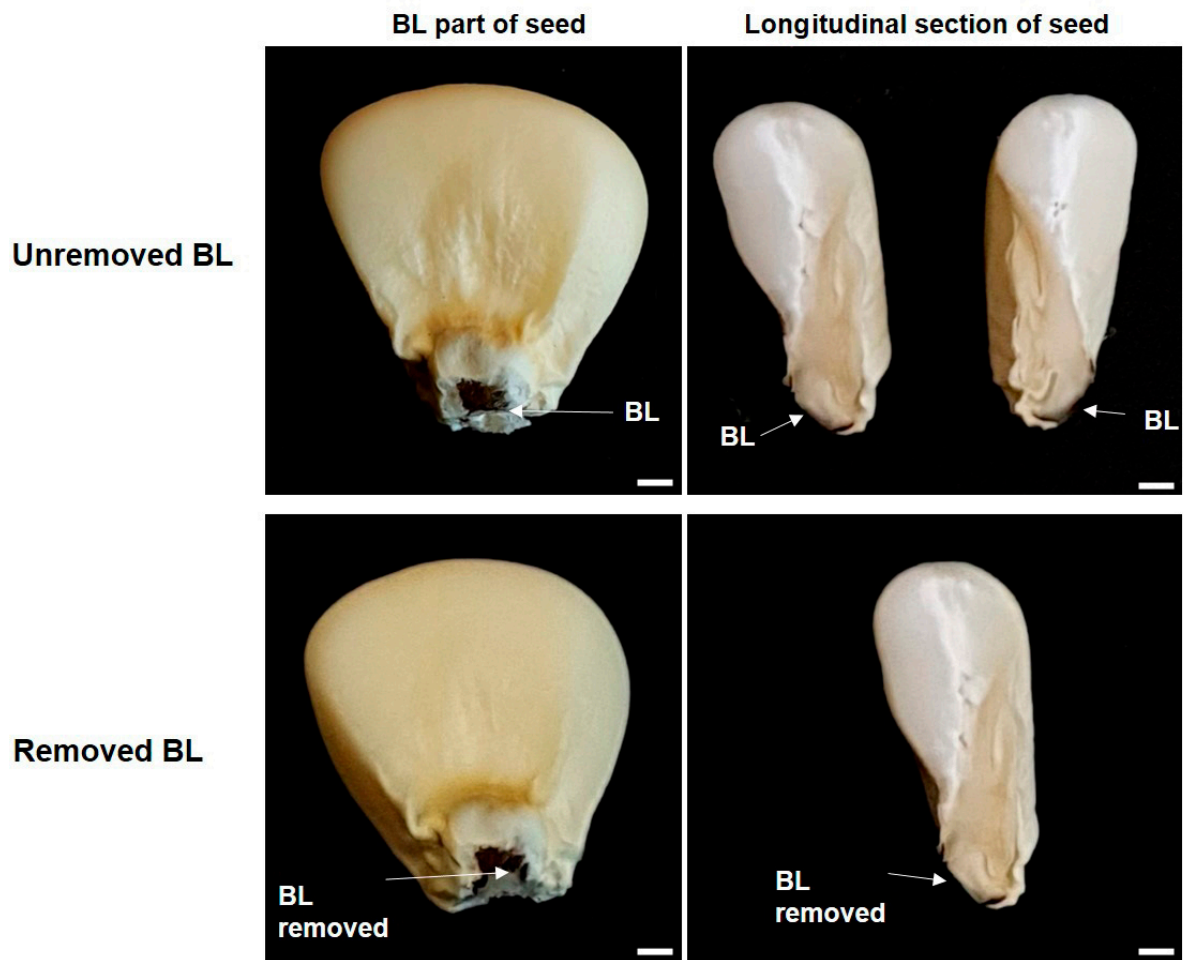

**Figure S5.** Location and removal area of the black layer in maize Hi IIA seeds. In order not to damage the inside of the seed, only a part ( $1\sim4\text{ mm}^2$ ) of the black layer was removed. BL, the black layer of maize seed. Bars = 1 mm.



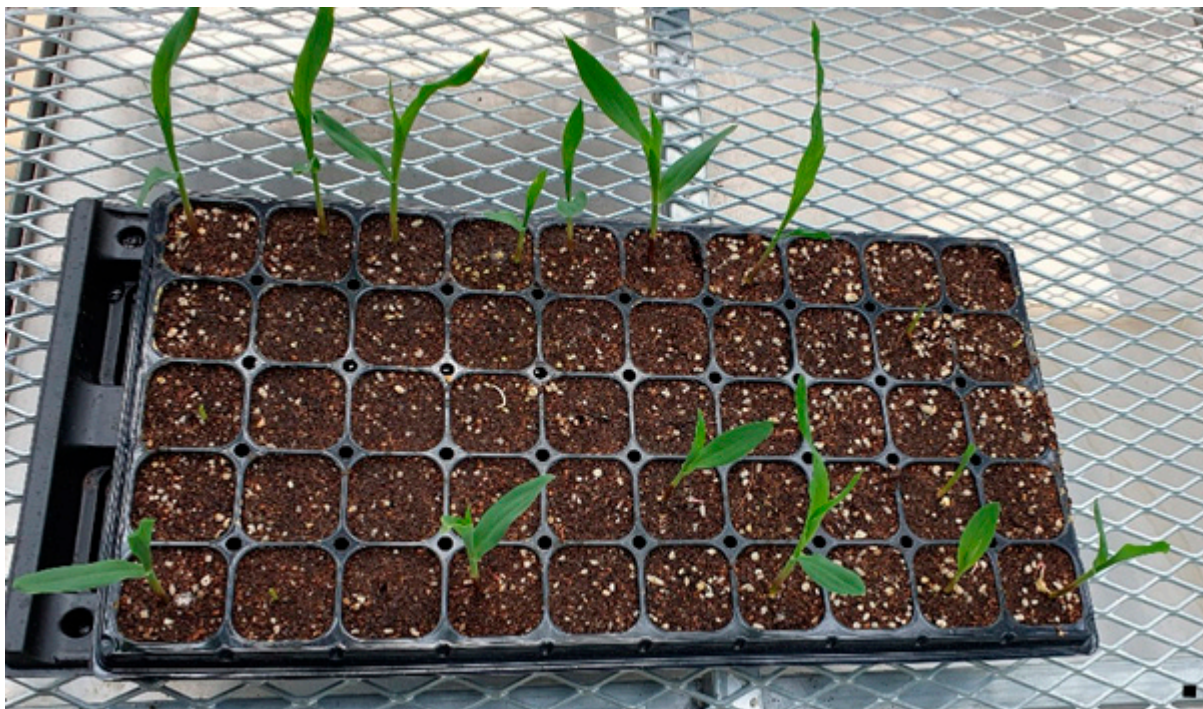

**Figure S6.** Standard flat with 50 hole-pots filled with potting mix for planting maize Hi IIA seeds. Fifteen-day-old germinated seedlings in greenhouse. Bar = 1 cm.

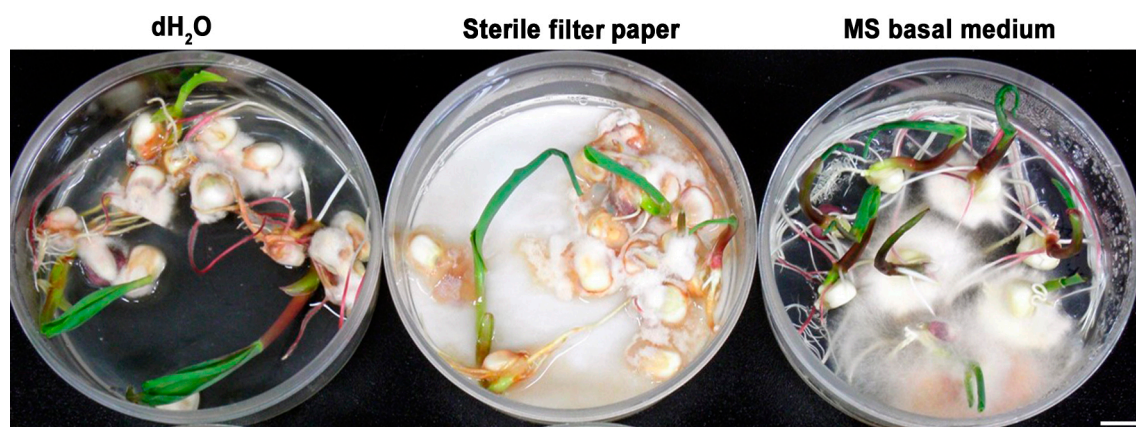

**Figure S7.** Microbial growth on maize Hi IIA seeds sterilized by the standard method. The sterilized seeds were placed on the sterile dH<sub>2</sub>O, sterile filter paper, and MS basal medium and the growth of microorganisms was observed for 7 days. Bar = 1 cm.



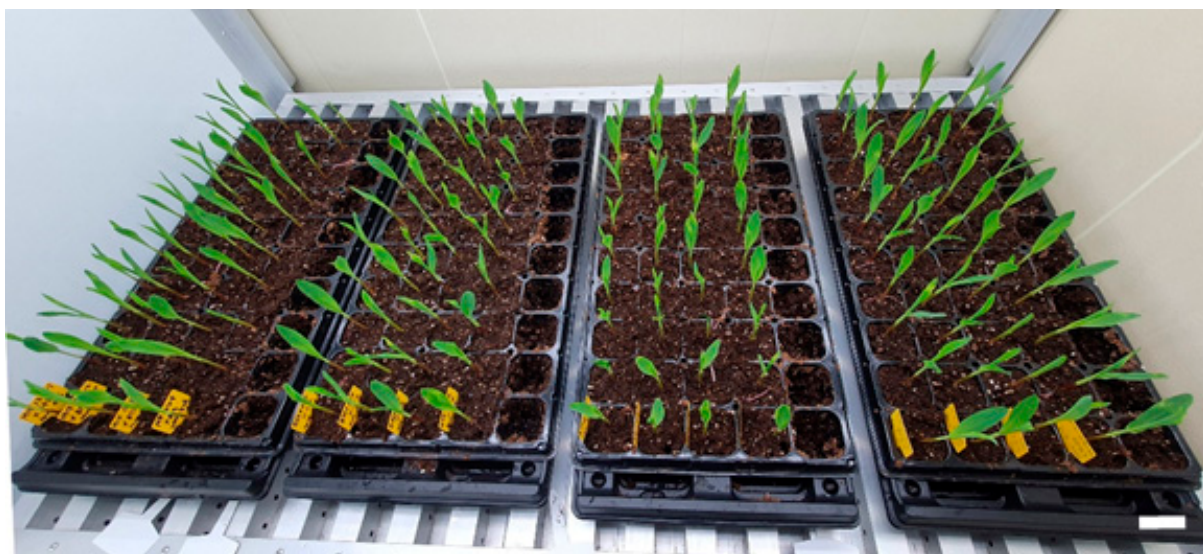

**Figure S8.** Maize Hi IIA seedlings grown for 4 days in the medium after exposure to sterilization treatment 4 were transplanted into pots and grown in growth chamber for 7 days. Bar = 5 cm.

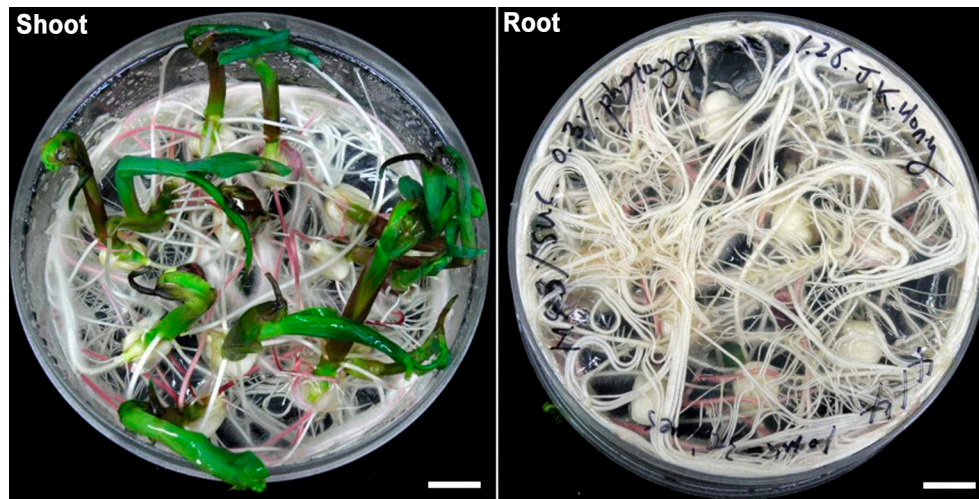

**Figure S9.** Maize Hi IIA seedlings growth after exposure to sterilization treatment 4. Macroscopic images showing microbial growth on the basal medium for 10 days after seed sterilization. Bars = 1 cm.

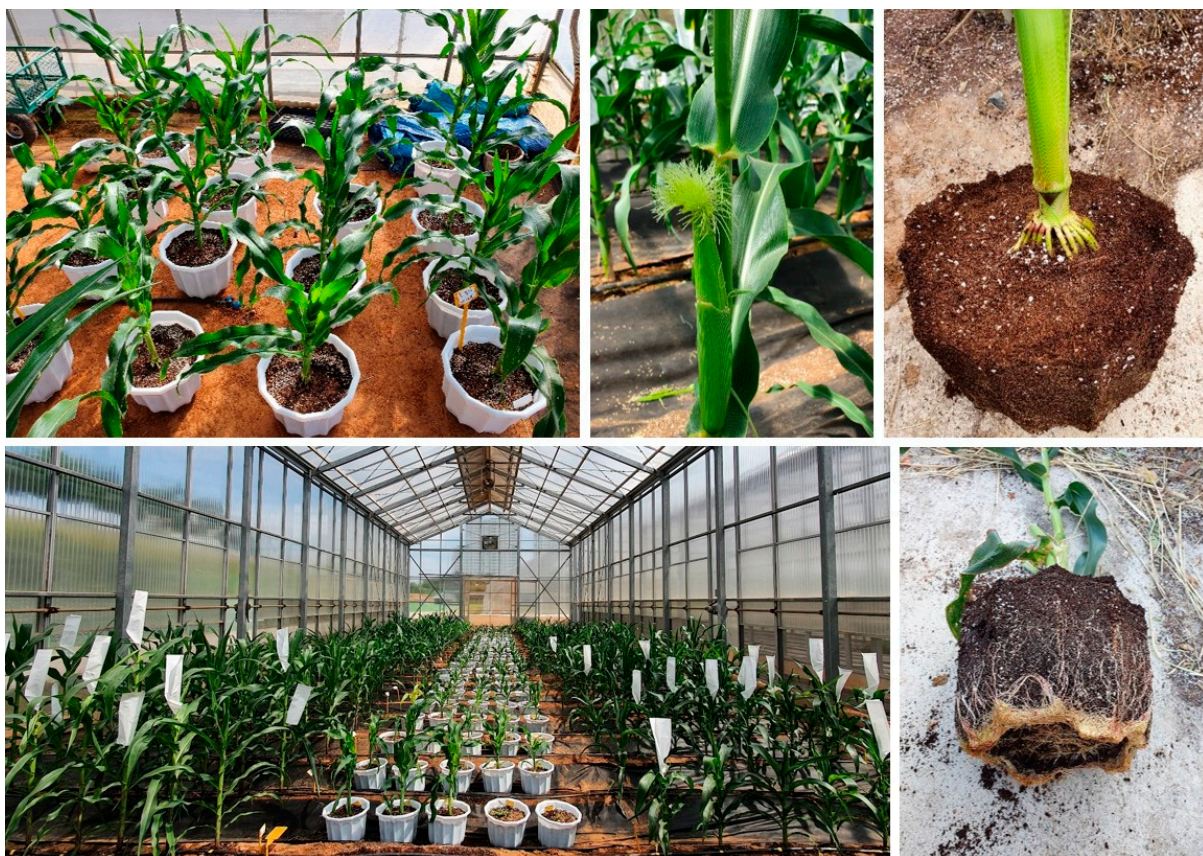

**Figure S10.** After sterilization maize seeds with optimized sterilization method, greenhouse growth.

**Table S1.** Germination of maize seeds in pots.

| Variety          | Germination         |       |       |       |          |         |         |
|------------------|---------------------|-------|-------|-------|----------|---------|---------|
|                  | Grains <sup>a</sup> | 1th-E | 2th-E | 3th-E | Mean (%) | Std.Dev | Std.Err |
| Hi IIA           | 1000                | 313   | 308   | 321   | 31.40    | 0.66    | 0.38    |
| Hi IIA× Hi IIB   | 1000                | 485   | 387   | 399   | 42.37    | 5.35    | 3.09    |
| A188             | 1000                | 659   | 618   | 639   | 63.87    | 2.05    | 1.18    |
| H99              | 1000                | 634   | 614   | 624   | 62.40    | 1.00    | 0.58    |
| B104             | 1000                | 884   | 863   | 891   | 87.93    | 1.46    | 0.84    |
| B73              | 1000                | 946   | 921   | 951   | 93.93    | 1.61    | 0.93    |
| B98              | 1000                | 963   | 954   | 971   | 96.27    | 0.85    | 0.49    |
| HW3              | 1000                | 707   | 699   | 721   | 70.90    | 1.11    | 0.64    |
| KS140            | 1000                | 948   | 933   | 920   | 93.37    | 1.40    | 0.81    |
| KS141            | 1000                | 983   | 990   | 964   | 97.90    | 1.35    | 0.78    |
| Hi IIA(♂)×B73(♀) | 300                 | 122   | 119   | 127   | 40.89    | 1.35    | 0.78    |
| B73(♂)×Hi IIA(♀) | 300                 | 103   | 93    | 101   | 33.00    | 1.76    | 1.02    |

<sup>a</sup> The amount of seeds used in an experiment.

E; germinated seeds, Std.Dev; standard deviation, Std.Err; standard error.



**Table S2.** Contamination and germination of maize Hi IIA seeds after exposure sterilization treatment 1.

| Variety          | Germination         |       |       |       |             |         |         | Contamination |       |       |             |
|------------------|---------------------|-------|-------|-------|-------------|---------|---------|---------------|-------|-------|-------------|
|                  | Grains <sup>a</sup> | 1th-E | 2th-E | 3th-E | G. Mean (%) | Std.Dev | Std.Err | 1th-C         | 2th-C | 3th-C | C. Mean (%) |
| Hi IIA           | 300                 | 294   | 290   | 292   | 97.33       | 0.67    | 0.38    | 300           | 300   | 300   | 100         |
| Hi IIA× Hi IIB   | 300                 | 298   | 297   | 294   | 98.78       | 0.69    | 0.40    | 300           | 300   | 300   | 100         |
| A188             | 300                 | 298   | 293   | 295   | 98.44       | 0.84    | 0.48    | 300           | 300   | 300   | 100         |
| H99              | 300                 | 297   | 296   | 294   | 98.56       | 0.51    | 0.29    | 300           | 300   | 300   | 100         |
| B104             | 300                 | 298   | 295   | 297   | 98.89       | 0.51    | 0.29    | 300           | 300   | 300   | 100         |
| B73              | 300                 | 300   | 298   | 299   | 99.67       | 0.33    | 0.19    | 300           | 300   | 300   | 100         |
| B98              | 300                 | 300   | 298   | 299   | 99.67       | 0.33    | 0.19    | 300           | 300   | 300   | 100         |
| HW3              | 300                 | 296   | 294   | 295   | 98.33       | 0.33    | 0.19    | 300           | 300   | 300   | 100         |
| KS140            | 300                 | 299   | 298   | 291   | 98.67       | 1.45    | 0.84    | 300           | 300   | 300   | 100         |
| KS141            | 300                 | 300   | 299   | 299   | 99.78       | 0.19    | 0.11    | 300           | 300   | 300   | 100         |
| Hi IIA(♂)×B73(♀) | 150                 | 149   | 144   | 149   | 98.22       | 1.92    | 1.11    | 150           | 150   | 150   | 100         |
| B73(♂)×Hi IIA(♀) | 150                 | 147   | 149   | 144   | 97.78       | 1.68    | 0.97    | 150           | 150   | 150   | 100         |

<sup>a</sup> The amount of seeds used in an experiment.

E; germinated seeds, G.Mean; germination rate mean (%), Std.Dev; standard deviation, Std.Err; standard error, C; ; contaminated seeds, C. Mean; contamination rate mean.

**Table S3.** Contamination and germination of maize Hi IIA seeds after exposure sterilization treatment 2.

| Variety          | Germination         |       |       |       |             |         |         | Contamination |       |       |             |         |         |
|------------------|---------------------|-------|-------|-------|-------------|---------|---------|---------------|-------|-------|-------------|---------|---------|
|                  | Grains <sup>a</sup> | 1th-E | 2th-E | 3th-E | G. Mean (%) | Std.Dev | Std.Err | 1th-C         | 2th-C | 3th-C | C. Mean (%) | Std.Dev | Std.Err |
| Hi IIA           | 300                 | 294   | 290   | 292   | 97.33       | 0.67    | 0.38    | 122           | 128   | 127   | 41.89       | 1.07    | 0.62    |
| Hi IIA×Hi IIB    | 300                 | 298   | 297   | 294   | 98.78       | 0.69    | 0.40    | 101           | 106   | 97    | 33.78       | 1.50    | 0.87    |
| A188             | 300                 | 298   | 293   | 295   | 98.44       | 0.84    | 0.48    | 89            | 99    | 74    | 29.11       | 4.19    | 2.42    |
| H99              | 300                 | 297   | 296   | 294   | 98.56       | 0.51    | 0.29    | 80            | 78    | 83    | 26.78       | 0.84    | 0.48    |
| B104             | 300                 | 298   | 295   | 297   | 98.89       | 0.51    | 0.29    | 78            | 71    | 76    | 25.00       | 1.20    | 0.69    |
| B73              | 300                 | 300   | 298   | 299   | 99.67       | 0.33    | 0.19    | 76            | 77    | 78    | 25.67       | 0.33    | 0.19    |
| B98              | 300                 | 300   | 298   | 299   | 99.67       | 0.33    | 0.19    | 82            | 80    | 81    | 27.00       | 0.33    | 0.19    |
| HW3              | 300                 | 296   | 294   | 295   | 98.33       | 0.33    | 0.19    | 77            | 74    | 70    | 24.56       | 1.17    | 0.68    |
| KS140            | 300                 | 299   | 291   | 298   | 98.67       | 1.45    | 0.84    | 92            | 88    | 84    | 29.33       | 1.33    | 0.77    |
| KS141            | 300                 | 295   | 296   | 294   | 98.33       | 0.33    | 0.11    | 98            | 101   | 84    | 31.44       | 3.02    | 1.75    |
| Hi IIA(♂)×B73(♀) | 150                 | 150   | 149   | 147   | 99.11       | 1.02    | 0.59    | 52            | 56    | 53    | 35.78       | 1.39    | 0.80    |
| B73(♂)×Hi IIA(♀) | 150                 | 150   | 148   | 148   | 99.11       | 0.77    | 0.44    | 54            | 53    | 56    | 36.11       | 0.84    | 0.48    |

<sup>a</sup> The amount of seeds used in an experiment.

E; germinated seeds, G. Mean; germination rate mean, Std.Dev; standard deviation, Std.Err; standard error, C; ; contaminated seeds, C. Mean; contamination rate mean.



**Table S4.** Contamination and germination of maize Hi IIA seeds after exposure sterilization treatment 3.

| Variety          | Germination         |       |       |       |             |         |         | Contamination |       |       |             |         |         |
|------------------|---------------------|-------|-------|-------|-------------|---------|---------|---------------|-------|-------|-------------|---------|---------|
|                  | Grains <sup>a</sup> | 1th-E | 2th-E | 3th-E | G. Mean (%) | Std.Dev | Std.Err | 1th-C         | 2th-C | 3th-C | C. Mean (%) | Std.Dev | Std.Err |
| Hi IIA           | 300                 | 296   | 294   | 295   | 98.33       | 0.33    | 0.19    | 59            | 55    | 61    | 19.44       | 1.02    | 0.59    |
| Hi IIA×Hi IIB    | 300                 | 298   | 294   | 296   | 98.67       | 0.67    | 0.38    | 61            | 60    | 54    | 19.44       | 1.26    | 0.73    |
| A188             | 300                 | 298   | 300   | 297   | 99.44       | 0.51    | 0.29    | 56            | 50    | 52    | 17.56       | 1.02    | 0.59    |
| H99              | 300                 | 296   | 299   | 297   | 99.11       | 0.51    | 0.29    | 57            | 56    | 57    | 18.89       | 0.19    | 0.11    |
| B104             | 300                 | 298   | 299   | 293   | 98.89       | 1.07    | 0.62    | 53            | 48    | 66    | 18.56       | 3.10    | 1.79    |
| B73              | 300                 | 300   | 297   | 299   | 99.56       | 0.51    | 0.29    | 58            | 65    | 51    | 19.33       | 2.33    | 1.35    |
| B98              | 300                 | 300   | 294   | 298   | 99.11       | 1.02    | 0.59    | 61            | 70    | 54    | 20.56       | 2.67    | 1.54    |
| HW3              | 300                 | 297   | 295   | 299   | 99.00       | 0.67    | 0.38    | 59            | 50    | 62    | 19.00       | 2.08    | 1.20    |
| KS140            | 300                 | 299   | 300   | 291   | 98.89       | 1.64    | 0.95    | 60            | 55    | 57    | 19.11       | 0.84    | 0.48    |
| KS141            | 300                 | 300   | 297   | 299   | 99.56       | 0.51    | 0.29    | 63            | 66    | 61    | 21.11       | 0.84    | 0.48    |
| Hi IIA(♂)×B73(♀) | 150                 | 149   | 145   | 147   | 98.00       | 1.33    | 0.77    | 26            | 30    | 33    | 19.78       | 2.34    | 1.35    |
| B73(♂)×Hi IIA(♀) | 150                 | 148   | 149   | 145   | 98.22       | 1.39    | 0.80    | 29            | 27    | 31    | 19.33       | 1.33    | 0.77    |

<sup>a</sup> The amount of seeds used in an experiment.

E; germinated seeds, G. Mean; germination rate mean, Std.Dev; standard deviation, Std.Err; standard error, C; ; contaminated seeds, C.R; contamination rate (%), C. Mean; contamination rate mean.

**Table S5.** Contamination and germination of maize Hi IIA seeds after exposure sterilization treatment 4.

| Variety          | Germination         |       |       |       |             |         |         | Contamination |       |       |             |         |         |
|------------------|---------------------|-------|-------|-------|-------------|---------|---------|---------------|-------|-------|-------------|---------|---------|
|                  | Grains <sup>a</sup> | 1th-E | 2th-E | 3th-E | G. Mean (%) | Std.Dev | Std.Err | 1th-C         | 2th-C | 3th-C | C. Mean (%) | Std.Dev | Std.Err |
| Hi IIA           | 300                 | 296   | 300   | 297   | 99.22       | 0.69    | 0.40    | 38            | 28    | 33    | 11.00       | 1.67    | 0.96    |
| Hi IIA×Hi IIB    | 300                 | 298   | 299   | 295   | 99.11       | 0.69    | 0.40    | 39            | 34    | 30    | 11.44       | 1.50    | 0.87    |
| A188             | 300                 | 298   | 294   | 295   | 98.56       | 0.69    | 0.40    | 37            | 32    | 36    | 11.67       | 0.88    | 0.51    |
| H99              | 300                 | 296   | 299   | 300   | 99.44       | 0.69    | 0.40    | 38            | 31    | 33    | 11.33       | 1.20    | 0.69    |
| B104             | 300                 | 298   | 289   | 299   | 98.44       | 1.84    | 1.06    | 37            | 27    | 39    | 11.44       | 2.14    | 1.24    |
| B73              | 300                 | 300   | 298   | 295   | 99.22       | 0.84    | 0.48    | 35            | 31    | 30    | 10.67       | 0.88    | 0.51    |
| B98              | 300                 | 300   | 299   | 297   | 99.56       | 0.51    | 0.29    | 39            | 29    | 40    | 12.00       | 2.03    | 1.17    |
| HW3              | 300                 | 297   | 299   | 299   | 99.44       | 0.38    | 0.22    | 41            | 29    | 30    | 11.11       | 2.22    | 1.28    |
| KS140            | 300                 | 299   | 300   | 294   | 99.22       | 1.07    | 0.62    | 40            | 34    | 31    | 11.67       | 1.53    | 0.88    |
| KS141            | 300                 | 300   | 299   | 294   | 99.22       | 1.07    | 0.62    | 37            | 33    | 27    | 10.78       | 1.68    | 0.97    |
| Hi IIA(♂)×B73(♀) | 150                 | 149   | 144   | 147   | 97.78       | 1.68    | 0.97    | 15            | 24    | 23    | 13.78       | 3.29    | 1.90    |
| B73(♂)×Hi IIA(♀) | 150                 | 148   | 142   | 148   | 97.33       | 2.31    | 1.33    | 19            | 20    | 21    | 13.33       | 0.67    | 0.38    |

<sup>a</sup> The amount of seeds used in an experiment.

E; germinated seeds, G. Mean; germination rate mean, Std.Dev; standard deviation, Std.Err; standard error, C; ; contaminated seeds, C.R; contamination rate (%), C. Mean; contamination rate mean.

**Table S6.** Contamination and germination of maize Hi IIA seeds during different sterilization treatments with removed black layer.

| Treatment<br>s | Germination         |       |       |       |             |         |         | Contamination |       |       |             |         |         |
|----------------|---------------------|-------|-------|-------|-------------|---------|---------|---------------|-------|-------|-------------|---------|---------|
|                | Grains <sup>a</sup> | 1th-E | 2th-E | 3th-E | G. Mean (%) | Std.Dev | Std.Err | 1th-C         | 2th-C | 3th-C | C. Mean (%) | Std.Dev | Std.Err |
| Treatment 1    | 300                 | 291   | 294   | 291   | 97.33       | 0.58    | 0.33    | 300           | 300   | 300   | 100.00      | 0.00    | 0.00    |
| Treatment 2    | 300                 | 294   | 299   | 298   | 99.00       | 0.88    | 0.51    | 106           | 99    | 101   | 34.00       | 1.20    | 0.69    |
| Treatment 3    | 300                 | 295   | 297   | 296   | 98.67       | 0.33    | 0.19    | 34            | 27    | 24    | 9.44        | 1.71    | 0.99    |
| Treatment 4    | 300                 | 296   | 299   | 299   | 99.33       | 0.58    | 0.33    | 3             | 1     | 0     | 0.44        | 0.51    | 0.29    |

<sup>a</sup> The amount of seeds used in an experiment.

E; germinated seeds, G. Mean; germination rate mean, Std.Dev; standard deviation, Std.Err; standard error, C; ; contaminated seeds, C.R; contamination rate (%), C. Mean; contamination rate mean.

**Table S7.** Effects of inverting RPM change during maize seed sterilization process 4 with removed black layer of maize Hi IIA seeds.

|     |            | Germination         |       |       |       |             |         |         | Contamination |       |       |             |         |         |
|-----|------------|---------------------|-------|-------|-------|-------------|---------|---------|---------------|-------|-------|-------------|---------|---------|
|     | Conditions | Grains <sup>a</sup> | 1th-E | 2th-E | 3th-E | G. Mean (%) | Std.Dev | Std.Err | 1th-C         | 2th-C | 3th-C | C. Mean (%) | Std.Dev | Std.Err |
| RPM | 25         | 300                 | 297   | 291   | 299   | 98.56       | 1.39    | 0.80    | 52            | 48    | 49    | 16.56       | 0.69    | 0.40    |
|     | 45         | 300                 | 294   | 296   | 297   | 98.56       | 0.51    | 0.29    | 2             | 0     | 0     | 0.22        | 0.38    | 0.22    |
|     | 65         | 300                 | 298   | 297   | 298   | 99.22       | 0.19    | 0.11    | 37            | 36    | 41    | 12.67       | 0.88    | 0.51    |

<sup>a</sup> The amount of seeds used in an experiment.

E; germinated seeds, G. Mean; germination rate mean, Std.Dev; standard deviation, Std.Err; standard error, C; ; contaminated seeds, C.R; contamination rate (%), C. Mean; contamination rate mean.

**Table S8.** Effects of the number of seeds during maize seed sterilization 4 with removed black layer of maize Hi IIA seeds.

| Conditions      |    | Germination         |       |       |       |             |         |         | Contamination |       |       |             |         |         |
|-----------------|----|---------------------|-------|-------|-------|-------------|---------|---------|---------------|-------|-------|-------------|---------|---------|
|                 |    | Grains <sup>a</sup> | 1th-E | 2th-E | 3th-E | G. Mean (%) | Std.Dev | Std.Err | 1th-C         | 2th-C | 3th-C | C. Mean (%) | Std.Dev | Std.Err |
| Number of seeds | 10 | 300                 | 298   | 300   | 289   | 98.56       | 1.95    | 1.13    | 2             | 0     | 0     | 0.22        | 0.38    | 0.22    |
|                 | 20 | 300                 | 294   | 298   | 299   | 99.00       | 0.88    | 0.51    | 1             | 1     | 0     | 0.22        | 0.19    | 0.11    |
|                 | 30 | 300                 | 293   | 299   | 291   | 98.11       | 1.39    | 0.80    | 32            | 29    | 31    | 10.22       | 0.51    | 0.29    |

<sup>a</sup> The amount of seeds used in an experiment.

E; germinated seeds, G. Mean; germination rate mean, Std.Dev; standard deviation, Std.Err; standard error, C; ; contaminated seeds, C.R; contamination rate (%), C. Mean; contamination rate mean.

**Table S9.** Contamination and germination of seeds after exposure sterilization treatment 4 with removed black layer of 11 varieties seeds.

| Variety            | Germination         |       |       |       |             |         |         | Contamination |       |       |             |         |         |
|--------------------|---------------------|-------|-------|-------|-------------|---------|---------|---------------|-------|-------|-------------|---------|---------|
|                    | Grains <sup>a</sup> | 1th-E | 2th-E | 3th-E | G. Mean (%) | Std.Dev | Std.Err | 1th-C         | 2th-C | 3th-C | C. Mean (%) | Std.Dev | Std.Err |
| Hi IIA×Hi IIB      | 300                 | 298   | 297   | 296   | 99.00       | 0.33    | 0.19    | 2             | 1     | 1     | 0.44        | 0.19    | 0.11    |
| A188               | 300                 | 298   | 294   | 297   | 98.78       | 0.69    | 0.40    | 2             | 0     | 2     | 0.44        | 0.38    | 0.22    |
| H99                | 300                 | 296   | 299   | 291   | 98.44       | 1.35    | 0.78    | 2             | 1     | 1     | 0.44        | 0.19    | 0.11    |
| B104               | 300                 | 298   | 294   | 297   | 98.78       | 0.69    | 0.40    | 0             | 0     | 0     | 0.00        | 0.00    | 0.00    |
| B73                | 300                 | 300   | 299   | 299   | 99.78       | 0.19    | 0.11    | 0             | 0     | 0     | 0.00        | 0.00    | 0.00    |
| B98                | 300                 | 300   | 299   | 299   | 99.78       | 0.19    | 0.11    | 0             | 0     | 0     | 0.00        | 0.00    | 0.00    |
| HW3                | 300                 | 297   | 291   | 294   | 98.00       | 1.00    | 0.58    | 0             | 0     | 0     | 0.00        | 0.00    | 0.00    |
| KS140              | 300                 | 299   | 297   | 299   | 99.44       | 0.38    | 0.22    | 2             | 1     | 1     | 0.44        | 0.19    | 0.11    |
| KS141              | 300                 | 300   | 300   | 300   | 100.00      | 0.00    | 0.00    | 2             | 1     | 0     | 0.33        | 0.33    | 0.19    |
| Hi IIA(♂) × B73(♀) | 150                 | 150   | 148   | 149   | 99.33       | 0.67    | 0.38    | 1             | 1     | 0     | 0.44        | 0.38    | 0.22    |
| B73(♂) × Hi IIA(♀) | 150                 | 150   | 150   | 150   | 100.00      | 0.00    | 0.00    | 1             | 0     | 1     | 0.44        | 0.38    | 0.22    |

<sup>a</sup> The amount of seeds used in an experiment.

E; germinated seeds, G. Mean; germination rate mean, Std.Dev; standard deviation, Std.Err; standard error, C; contaminated seeds, C.R; contamination rate (%), C. Mean; contamination rate mean.



**Table S10.** Transformation efficiency according to the sterilization method of Hi IIA maize seeds.

| Treatment                                           | Experimental year | No. of seeds | No. of transplant / rate (%) | Pollinated ears / pollination rate (%) | No. of immature embryo infected (A) | No. of Bialaphos resistant callus (B) | Transformation Efficiency (B/Ax100, %) |
|-----------------------------------------------------|-------------------|--------------|------------------------------|----------------------------------------|-------------------------------------|---------------------------------------|----------------------------------------|
| Sterilization treatment 2                           | 18                | 600          | 256 / 42.6                   | 174 / 68                               | 293                                 | 6                                     | 2.05                                   |
|                                                     | 19                | 1,200        | 464 / 38.6                   | 325 / 70                               | 4,114                               | 127                                   | 3.09                                   |
|                                                     | 20                | 1,000        | 364 / 36.4                   | 186 / 51                               | 2,054                               | 106                                   | 4.23                                   |
|                                                     | Total : 18~20     | 2,800        | 1,084 / 38.7                 | 685 / 63.2                             | 6,911                               | 239                                   | 3.46                                   |
| Sterilization treatment 4 with black layer removed. | 21                | 500          | 464 / 92.8                   | 264 / 57                               | 2,343                               | 149                                   | 6.36                                   |
|                                                     | 22                | 450          | 424 / 94.2                   | 140 / 33                               | 2,092                               | 358                                   | 17.11                                  |
|                                                     | 23                | 250          | 230 / 92                     | 75 / 32.6                              | 1,385                               | ongoing                               | ongoing                                |
|                                                     | Total : 21~23     | 1,200        | 1,118 / 93.2                 | 464 / 42.8                             | 4,435 <sup>a</sup>                  | 507 <sup>b</sup>                      | 11.43 <sup>c</sup>                     |

<sup>a</sup> Total immature embryo used in the experiment for 2 years ('21 ~'22).

<sup>b</sup> The sum of Bialaphos resistance callus analyzed over a tow-year period ('21 ~'22).

<sup>c</sup> Average value of transformation efficiency for two years ('21 ~'22).
